# Supplementary material for: Tumor Tissue-Specific Biomarkers of Colorectal Cancer by Anatomic Location and Stage
Source: PubMed Central journal article supplement (PMC7345993; doi:10.3390/metabo10060257), 2020-06-19
Supplement: metabolites-10-00257-s001.pdf [file metabolites-10-00257-s001.pdf]

## ***Supplementary Information for***

# **Tumor Tissue-Specific Biomarkers of Colorectal Cancer by Anatomic Location and Stage**

### **Authors**

Yuping Cai, Nicholas J.W. Rattray, Qian Zhang, Varvara Mironova, Alvaro Santos-Neto, Engjel Muca Ana K. Rosen Vollmar, Kuo-Shun Hsu, Zahra Rattray, Justin R. Cross, Yawei Zhang, Philip B. Paty, Sajid A. Khan, Caroline H. Johnson

Sajid A. Khan, Department of Surgery, Division of Surgical Oncology, Yale University School of Medicine, New Haven, CT, USA.

[sajid.khan@yale.edu](mailto:sajid.khan@yale.edu)

Caroline H. Johnson, Department of Environmental Health Sciences, Yale School of Public Health, Yale University, New Haven, CT USA

[caroline.johnson@yale.edu](mailto:caroline.johnson@yale.edu)

**Table S1.** Demographics of colon cancer patients from samples used for discovery of metabolic differences between colon cancer and normal controls.

|                         | <b>Normal Controls<br/>(n = 39)</b> | <b>Colon Cancer<br/>Discovery (n = 39)</b> | <b>Colon Cancer<br/>Validation (n = 39)</b> |
|-------------------------|-------------------------------------|--------------------------------------------|---------------------------------------------|
| <b>Sex, n</b>           |                                     |                                            |                                             |
| Male                    | 27 (69%)                            | 20 (51%)                                   | 20 (51%)                                    |
| Female                  | 12 (31%)                            | 19 (49%)                                   | 19 (49%)                                    |
| <b>Age, mean (sd)</b>   | 67.4 (12.4)                         | 69.5 (8.5)                                 | 68.9 (6.8)                                  |
| <b>Stage (I/II/III)</b> | —                                   | 13/14/12                                   | 13/14/12                                    |

**Table S2. List of 28 identified tumor tissue-specific metabolite biomarkers of colon cancer.**

| Metabolite                  | m/z (Da) | RT (seconds) | VIP  | FC <sup>a</sup> | q value <sup>b</sup> | LC    | Polarity | MSI <sup>c</sup> |
|-----------------------------|----------|--------------|------|-----------------|----------------------|-------|----------|------------------|
| Taurine                     | 124.0061 | 284.7        | 3.16 | 3.22            | 1.46E-14             | HILIC | NEG      | 1                |
| Glutamate                   | 146.0446 | 385.7        | 2.43 | 2.83            | 9.02E-08             | HILIC | NEG      | 1                |
| CDP-choline                 | 487.1012 | 431.5        | 2.22 | 6.18            | 5.65E-10             | HILIC | NEG      | 1                |
| Fructose 6-phosphate        | 241.0123 | 426.2        | 2.16 | 6.07            | 1.02E-09             | HILIC | NEG      | 1                |
| Hypoxanthine                | 119.0356 | 163.4        | 2.12 | 1.40            | 2.79E-07             | HILIC | POS      | 1                |
| Phenylalanine               | 207.1130 | 252.0        | 2.10 | 2.52            | 2.95E-06             | HILIC | POS      | 2                |
| Phosphoethanolamine         | 164.0079 | 441.2        | 2.06 | 2.23            | 5.85E-06             | HILIC | POS      | 1                |
| Creatinine                  | 114.0655 | 164.3        | 2.04 | 0.34            | 7.44E-08             | HILIC | POS      | 1                |
| GDP-glucose                 | 621.0890 | 434.0        | 2.01 | 4.22            | 2.47E-04             | HILIC | NEG      | 1                |
| CDP-ethanolamine            | 445.0537 | 436.0        | 2.00 | 6.37            | 5.76E-07             | HILIC | NEG      | 1                |
| Lactate                     | 89.02333 | 218.2        | 1.94 | 1.58            | 5.26E-05             | HILIC | NEG      | 1                |
| Uracil                      | 111.0204 | 88.3         | 1.93 | 2.60            | 2.07E-07             | HILIC | NEG      | 1                |
| Palmitoylcarnitine          | 400.3441 | 164.9        | 1.86 | 1.96            | 2.60E-05             | HILIC | POS      | 2                |
| S-adenosyl-L-homocysteine   | 385.1282 | 363.2        | 1.84 | 3.42            | 5.01E-06             | HILIC | POS      | 1                |
| PE (34:1)                   | 716.5262 | 635.2        | 1.83 | 2.84            | 2.15E-05             | RPLC  | NEG      | 2                |
| Fucose-1-phosphate          | 243.0285 | 438.0        | 1.80 | 2.65            | 9.68E-07             | HILIC | NEG      | 1                |
| CMP-N-acetylneuraminic acid | 613.1417 | 434.1        | 1.80 | 2.48            | 1.45E-05             | HILIC | NEG      | 1                |
| UDP-N-acetylglucosamine     | 606.0746 | 423.6        | 1.78 | 8.93            | 1.28E-03             | HILIC | NEG      | 1                |
| GMP                         | 362.0514 | 432.3        | 1.78 | 2.54            | 4.58E-05             | HILIC | NEG      | 1                |
| AMP                         | 346.0567 | 399.4        | 1.78 | 1.70            | 1.02E-04             | HILIC | NEG      | 1                |
| dAMP                        | 332.0761 | 402.3        | 1.69 | 3.34            | 1.10E-09             | HILIC | POS      | 1                |
| Glucose 6-phosphate         | 259.0227 | 464.0        | 1.65 | 3.60            | 1.10E-08             | HILIC | NEG      | 1                |
| LysoPE (22:5)               | 548.2712 | 425.3        | 1.61 | 0.35            | 1.63E-03             | RPLC  | NEG      | 2                |
| UDP                         | 384.9866 | 423.4        | 1.59 | 2.63            | 2.78E-04             | HILIC | NEG      | 1                |
| Formylmethionine            | 176.0393 | 188.9        | 1.58 | 2.05            | 4.45E-08             | HILIC | NEG      | 1                |
| Glycerol 3-phosphate        | 155.0099 | 433.9        | 1.55 | 0.58            | 2.68E-04             | RPLC  | POS      | 2                |
| UDP -glucuronate            | 579.0289 | 469.1        | 1.54 | 3.78            | 6.75E-04             | HILIC | NEG      | 1                |
| Adenine                     | 136.0610 | 394.4        | 1.50 | 1.53            | 3.40E-03             | HILIC | POS      | 1                |

<sup>a</sup>FC, fold change was calculated by dividing median value of cancer samples by median value of normal samples; <sup>b</sup>q value was calculated using pairwise Wilcoxon Mann-Whitney U test with Benjamini-Hochberg-based FDR correction; <sup>c</sup>MSI metabolite standard initiative level [1].

**Table S3.** Demographics of colon cancer patients from samples used for discovery of metabolic differences between RCC and LCC. Right-sided colon cancer = RCC, Left-sided colon cancer = LCC.

|                   | Normal  | Stage I       |               | P <sup>a</sup> | Stage II      |               | P <sup>a</sup> | Stage III     |               | P <sup>a</sup> |
|-------------------|---------|---------------|---------------|----------------|---------------|---------------|----------------|---------------|---------------|----------------|
|                   |         | RCC<br>(n=22) | LCC<br>(n=25) |                | RCC<br>(n=44) | LCC<br>(n=42) |                | RCC<br>(n=32) | LCC<br>(n=32) |                |
| <b>Sex, n</b>     |         |               |               |                |               |               |                |               |               |                |
| Male              | 27(69%) | 10(45%)       | 15 (40%)      |                | 23(52%)       | 25(59%)       |                | 15(47%)       | 14(44%)       |                |
| Female            | 12(31%) | 12(55%)       | 10(60%)       |                | 21(48%)       | 17(41%)       |                | 17(53%)       | 18(56%)       |                |
| <b>Tumor size</b> |         |               |               |                |               |               |                |               |               |                |
| mean (sd)         |         | 3.9 (1.5)     | 3.5 (1.3)     | 0.28           | 6.2 (2.6)     | 4.7 (1.7)     | 0.002          | 5.4 (1.8)     | 4.6 (1.7)     | 0.09           |
| <b>Age, mean</b>  |         |               |               |                |               |               |                |               |               |                |
| Male              | 69.3    | 73.9          | 69.3          |                | 72.9          | 72.2          |                | 73.5          | 63.7          |                |
| Female            | 63.3    | 72.1          | 69.6          |                | 73.5          | 69.1          |                | 72.2          | 71.1          |                |

<sup>a</sup> P value: Student *t* test

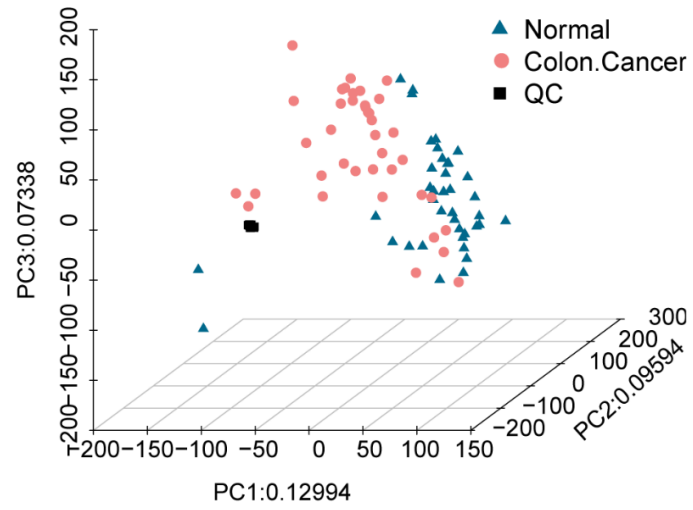

**Figure S1:** PCA scores plot from metabolomics analysis of normal colon tissues, colon cancer tissues, and quality control (QC) samples.

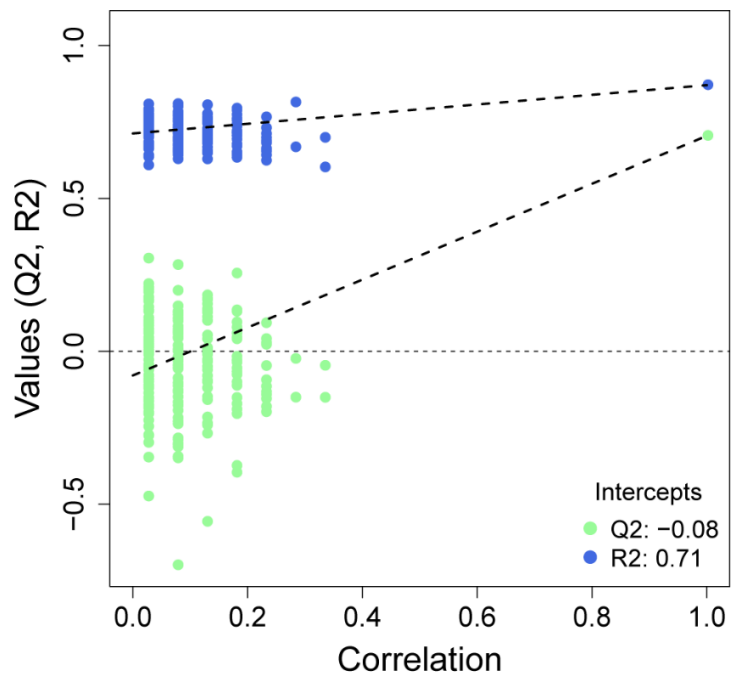

**Figure S2:** OPLS-DA validation plot obtained from 200 permutation tests on normal colon (n=39) and colon cancer samples (n=39).

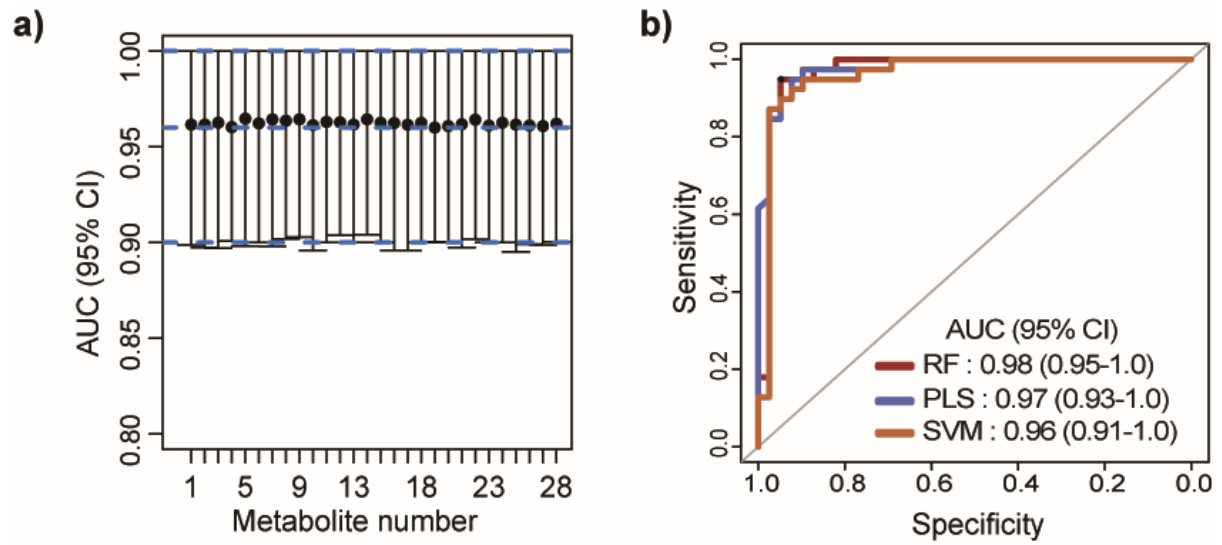

**Figure S3:** (a) AUC values of PLS prediction models with increasing number of metabolic biomarkers. (b) ROC plots of predictive models based on nine metabolic biomarkers using random forest (RF), partial least-squares (PLS), and support vector machine (SVM), respectively.

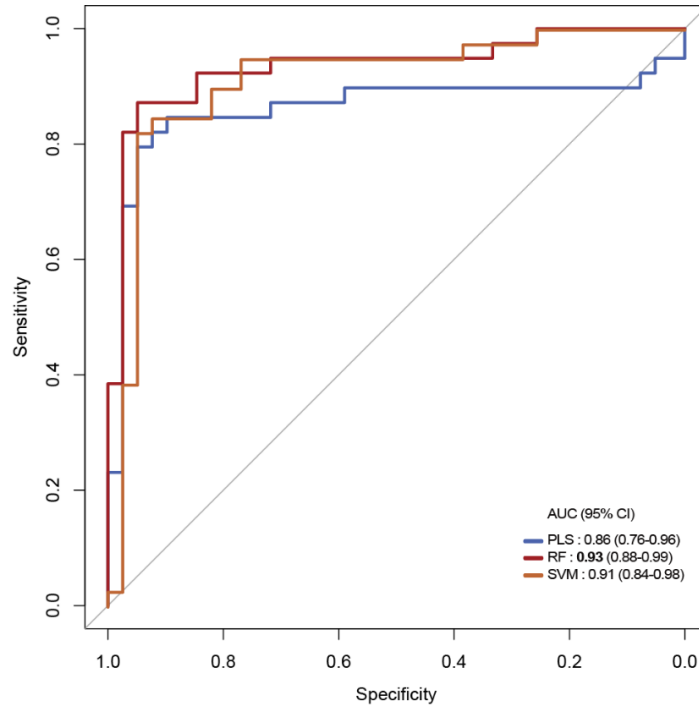

**Figure S4:** ROC plots of models in validation data set based on nine metabolic biomarkers using random forest (RF), partial least-squares (PLS), and support vector machine (SVM), respectively.



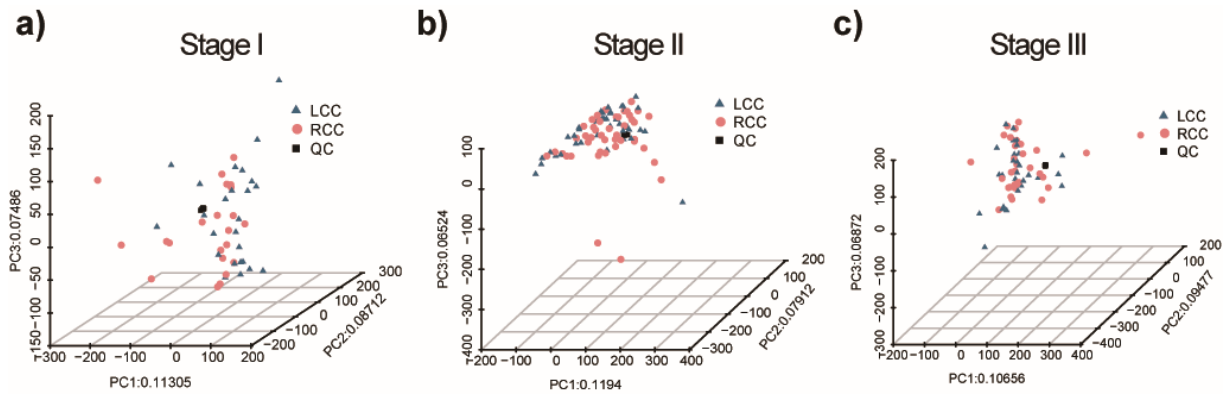

**Figure S5:** Stage stratified PCA score plots from left-sided colon cancer (LCC), right-sided colon cancer (RCC) tissues, and quality control (QC) samples.

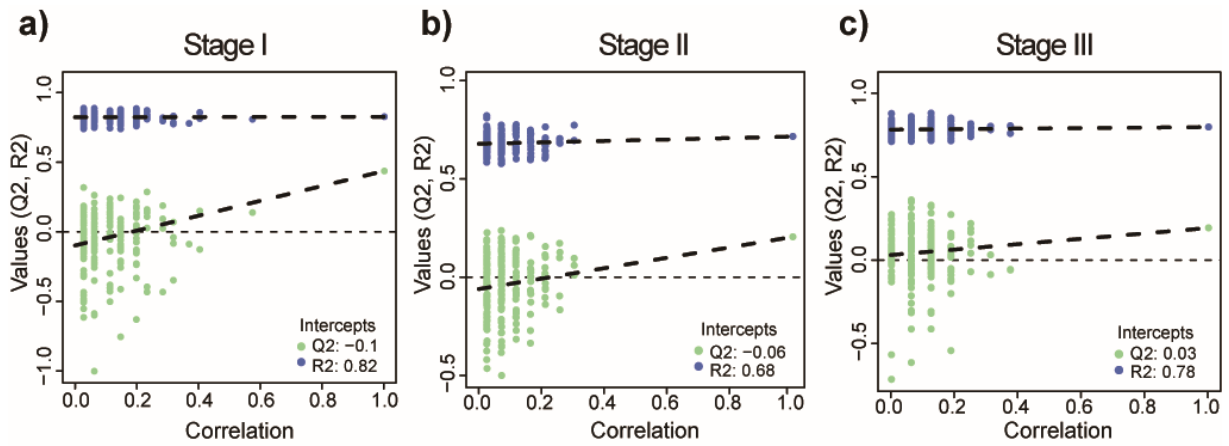

**Figure S6:** Validation plots obtained from 200 permutation tests for **(a)** stage I LCC ( $n = 25$ ) and stage I RCC ( $n = 22$ ) **(b)** stage II LCC ( $n = 42$ ) and stage II RCC ( $n = 44$ ), and **(c)** stage III LCC ( $n = 32$ ) and stage III RCC ( $n = 32$ ).

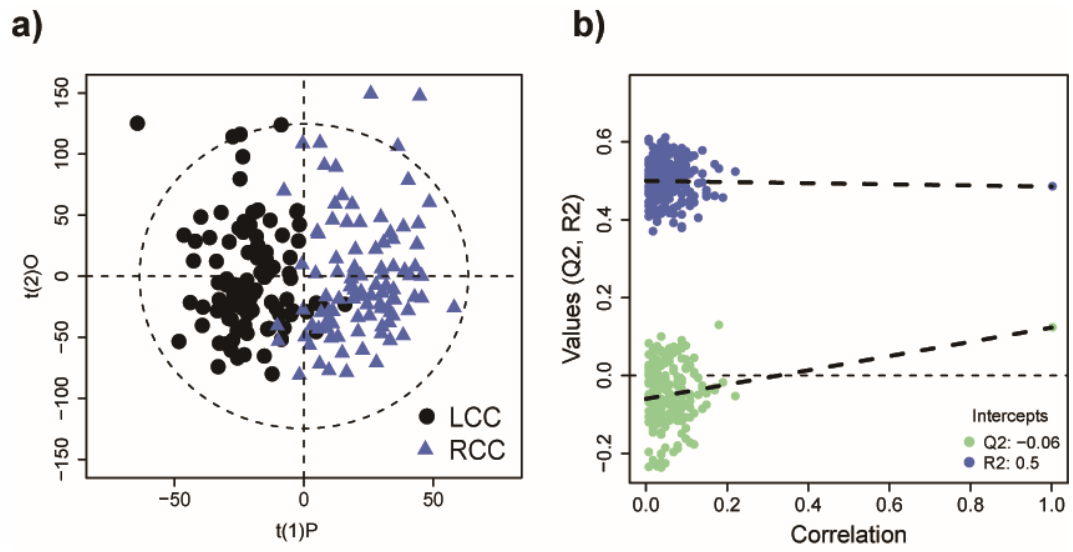

**Figure S7:** (a) OPLS-DA plot for metabolic signatures of stages I-III LCC (n = 99) and stages I-III RCC (n = 98). (b) Validation plots obtained from 200 permutation tests.

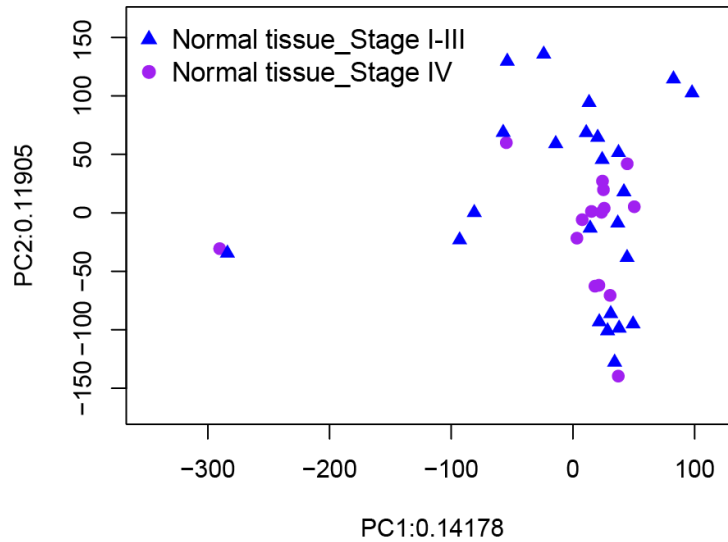

**Figure S8:** PCA scores plot of normal colon tissues from stage I-III patients and stage IV patients.

**Reference:**

1. Sumner, L.W.; Amberg, A.; Barrett, D.; Beale, M.H.; Beger, R.; Daykin, C.A.; Fan, T.W.; Fiehn, O.; Goodacre, R.; Griffin, J.L., *et al.* Proposed minimum reporting standards for chemical analysis chemical analysis working group (cawg) metabolomics standards initiative (msi). *Metabolomics : Official journal of the Metabolomic Society* **2007**, *3*, 211-221.
